# Supplementary material for: Data on administration of cyclosporine, nicorandil, metoprolol on reperfusion related outcomes in ST-segment Elevation Myocardial Infarction treated with percutaneous coronary intervention
Source: PubMed Central journal article supplement (PMC5537426; doi:10.1016/j.dib.2017.07.033), 2017-07-18
Supplement: mmc1.pdf [file mmc1.pdf]

# Conflicts of Interest Statement

Manuscript title: The role of cyclosporine, nitroglycerin, metoprolol and follow-up effect on  
perfusion related outcomes in ST elevation myocardial infarction treated with primary  
coronary intervention: subgroup analyses.

The authors whose names are listed immediately below certify that they have NO affiliations with or involvement in any organization or entity with any financial interest (such as honoraria; educational grants; participation in speakers' bureaus; membership, employment, consultancies, stock ownership, or other equity interest; and expert testimony or patent-licensing arrangements), or non-financial interest (such as personal or professional relationships, affiliations, knowledge or beliefs) in the subject matter or materials discussed in this manuscript.

## Author names:

Gronche Coupo, Rita Parvathi, Giouppala Mancione, Masakuni Katsukawa, Jacob  
Lambert, Amrit Anand, Kiyomi Ishii, Michael Funnell, Michael O'Leary,  
Marcelo Galvani, Dan Ator, Berja Iborat, Giouppala Carrasco, Simone Pincofere,  
Brawley J Neil, Masavari Arshad, Thomas Eustace, Daniel A Jones, Dave Dawson,  
Roberto Ferrari, Paolo Prentan, Filippo Abbati.

The authors whose names are listed immediately below report the following details of affiliation or involvement in an organization or entity with a financial or non-financial interest in the subject matter or materials discussed in this manuscript. Please specify the nature of the conflict on a separate sheet of paper if the space below is inadequate.

## Author names:

- Lincoff receives research support from Koi Pharmaceuticals;
- Gibran receives research support from Stealth pharmaceuticals.



This statement is signed by all the authors to indicate agreement that the above information is true and correct (a photocopy of this form may be used if there are more than 10 authors):

Author's name (typed)

Author's signature

Date

MICHAEL ONZE



12/07/2017

MARCELO GALVANI

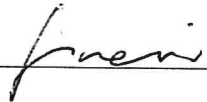

10/07/2017

DAN ATAN



11/07/2017

BOJJA IBANEZ

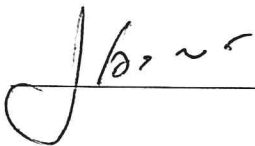

11/07/2017

GIAMPAOLO CENZANO



10/07/2017

SIMONE BISLAGUA



11/07/2017

BLANDON J NEIL



11/07/2017

MASATONI MATSUDA

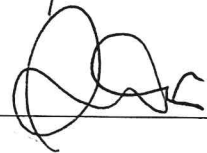

11/07/2017

THOMAS ENGSTROM



10/07/2017

DANIEL A JONES



11/07/2017

This statement is signed by all the authors to indicate agreement that the above information is true and correct (a photocopy of this form may be used if there are more than 10 authors):

Author's name (typed)

Author's signature

Date

DANA DANSON

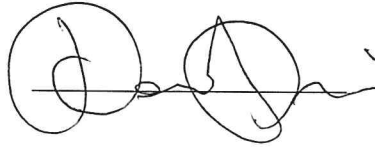

10/07/2017

ROBERTO FERRARI

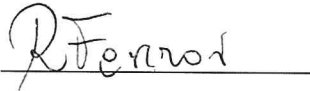

11/07/2017

PAOLO PINTON

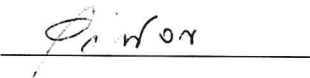

11/07/2017

RUCCA OTTAVI

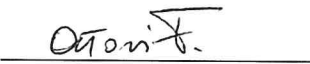

10/07/2017

\_\_\_\_\_

\_\_\_\_\_

\_\_\_\_\_

\_\_\_\_\_

\_\_\_\_\_

\_\_\_\_\_

\_\_\_\_\_

\_\_\_\_\_

\_\_\_\_\_

\_\_\_\_\_

\_\_\_\_\_

\_\_\_\_\_

\_\_\_\_\_

\_\_\_\_\_

\_\_\_\_\_

\_\_\_\_\_

\_\_\_\_\_

\_\_\_\_\_
